# Supplementary material for: Synthesis and DSSC application of BODIPY decorated triazole bridged and benzene nucleus cored conjugated dendrimers
Source: Royal Society of Chemistry journal article supplement (doi:10.1039/d0ra01672a), 2020-01-01
Supplement: d0ra01672a1.pdf [file d0ra01672a1.pdf]

## Synthesis and DSSC application of BODIPY decorated triazole bridged and benzene nucleus cored conjugated dendrimers

Velautham Saravanan<sup>a</sup>, Shanmugam Ganesan,<sup>b</sup> and Perumal Rajakumar<sup>\*a</sup>

<sup>a</sup>Department of Organic Chemistry, University of Madras, Guindy Campus, Chennai

600 025, Tamil Nadu, India E-mail: perumalrajakumar@gmail.com; Fax: +91 044 22300488;

Tel: +91 044 22202814; 9551379907

<sup>b</sup>Department of Chemistry, SRM Nagar, SRM Institute of Science and Technology,

Kattankulathur-603203, Tamil Nadu, India

### SUPPORTING INFORMATIONS

1. <sup>1</sup>H and <sup>13</sup>C NMR spectra of compounds **7**, **9**, **11**, **1**, **2** and **3** ..... p 9-21
2. BODIPY dendrimers **1**, **2** and **3** for UV-Vis absorption spectra of dye-adsorbed TiO<sub>2</sub> electrode ..... P 16
3. The SEM analysis of a) TiO<sub>2</sub> coated b) BODIPY with TiO<sub>2</sub> ..... P 17
4. The anchoring group in the dendrimer for DSSC studies core and surface; ..... P 17

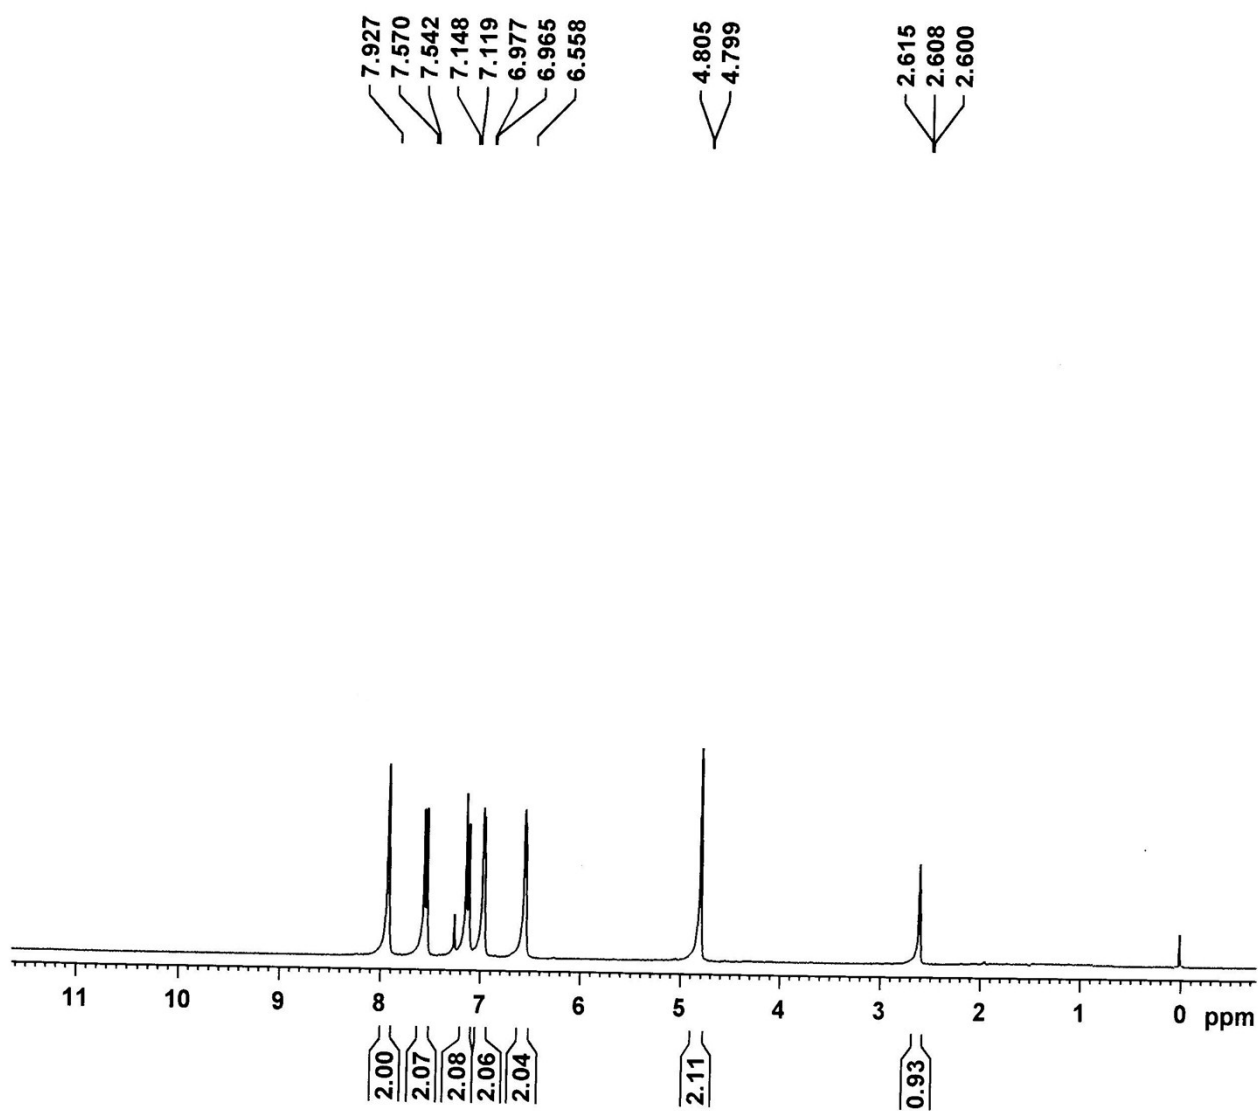

<sup>1</sup>H NMR spectrum (300 MHz, CDCl<sub>3</sub>) of BODIPY 12

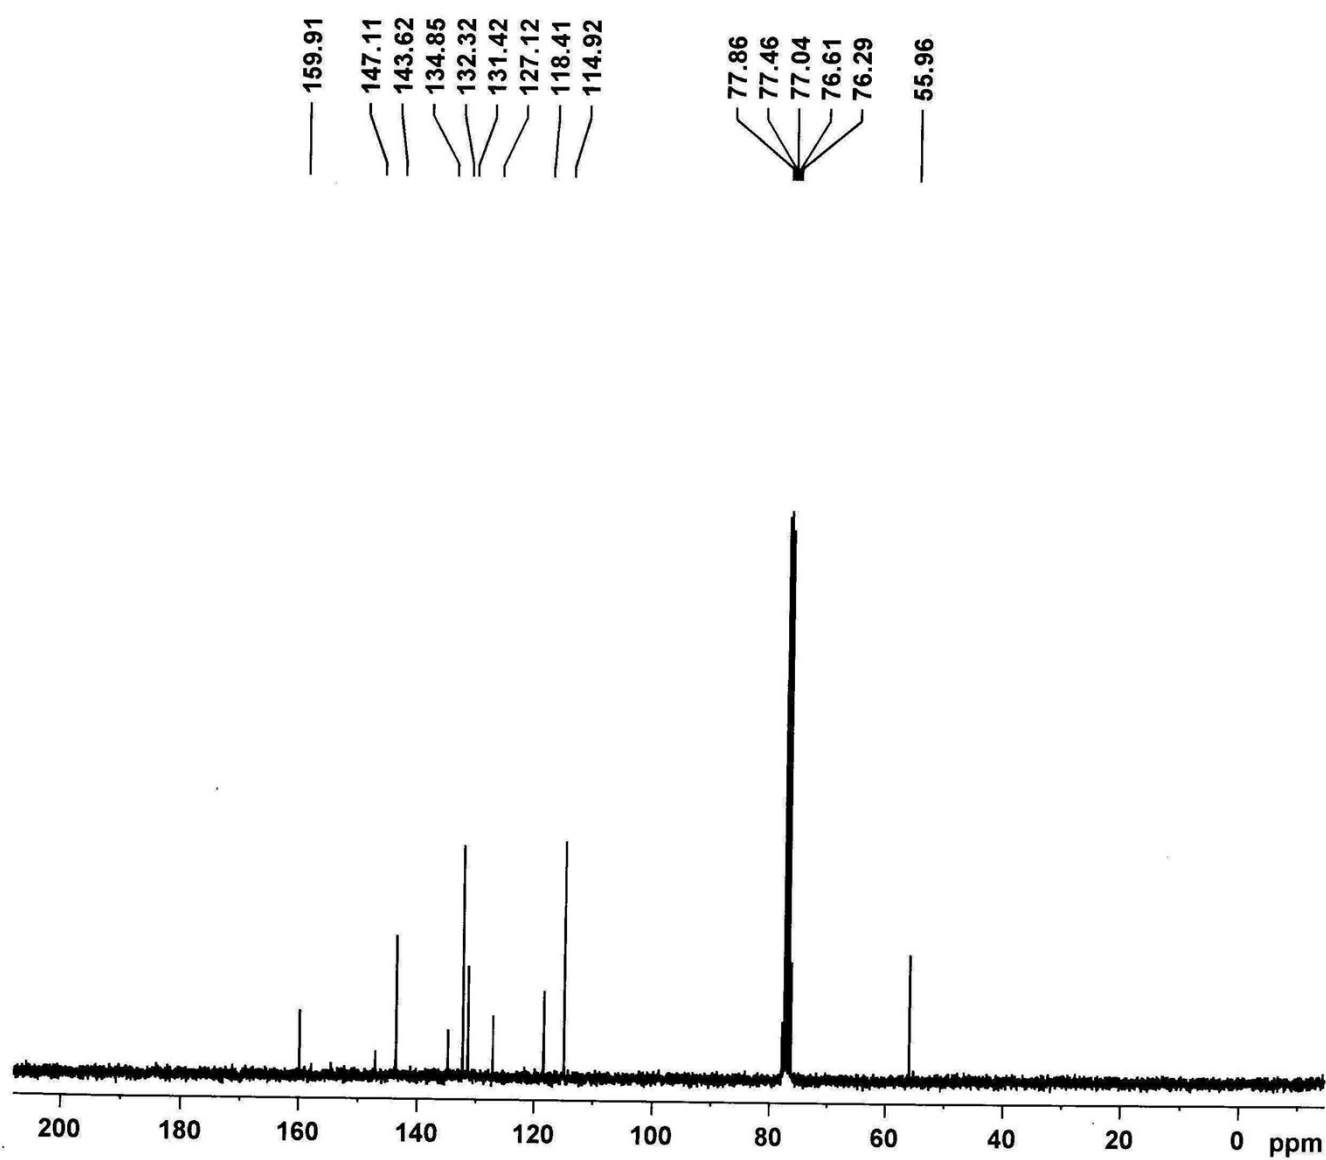

$^{13}\text{C}$  NMR spectrum (75 MHz,  $\text{CDCl}_3$ ) of BODIPY 12

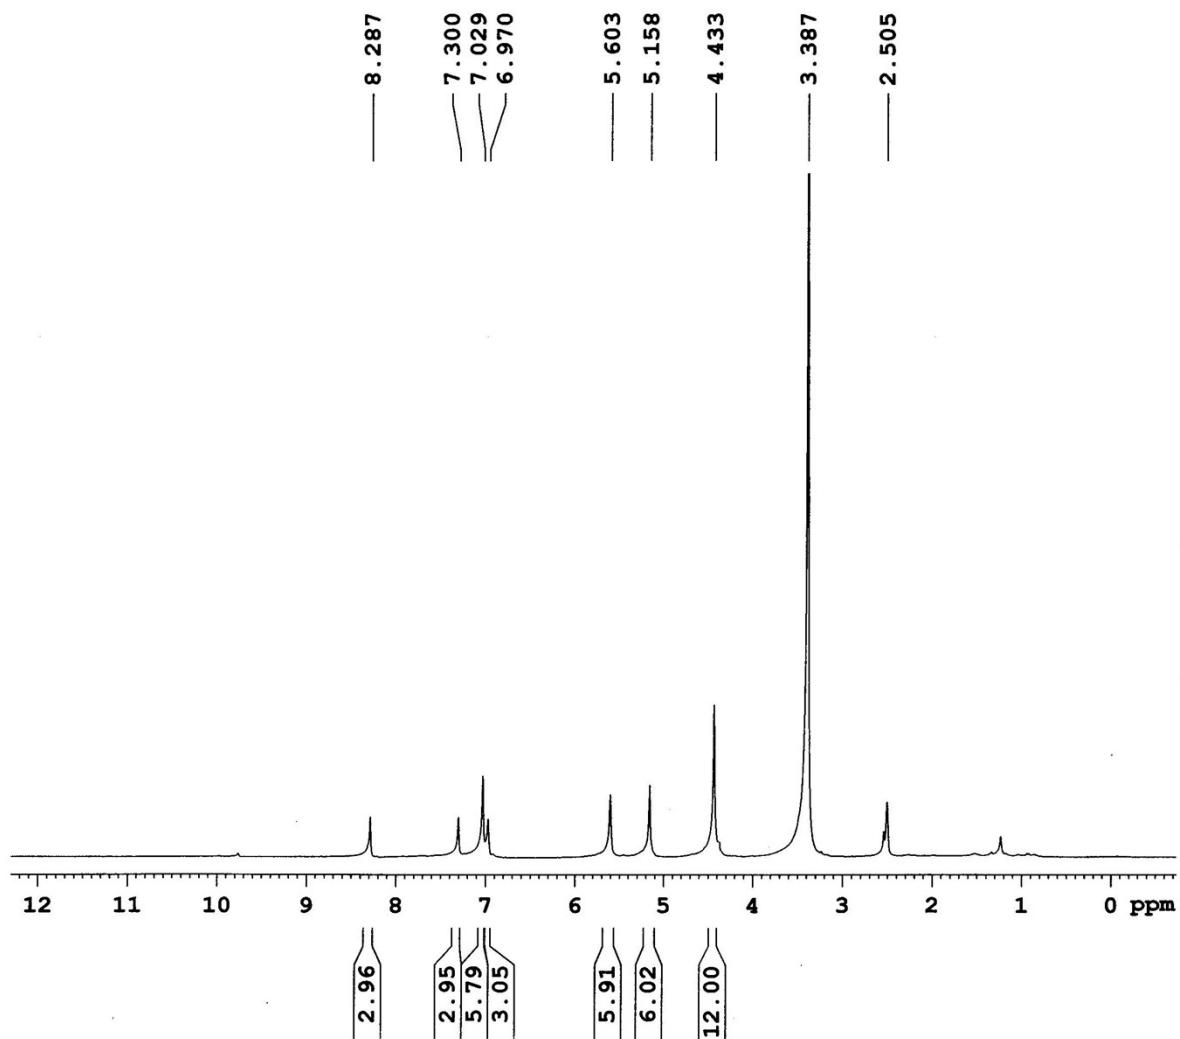

<sup>1</sup>H NMR spectrum (300 MHz, CDCl<sub>3</sub>) of the first generation chlorodendron 6

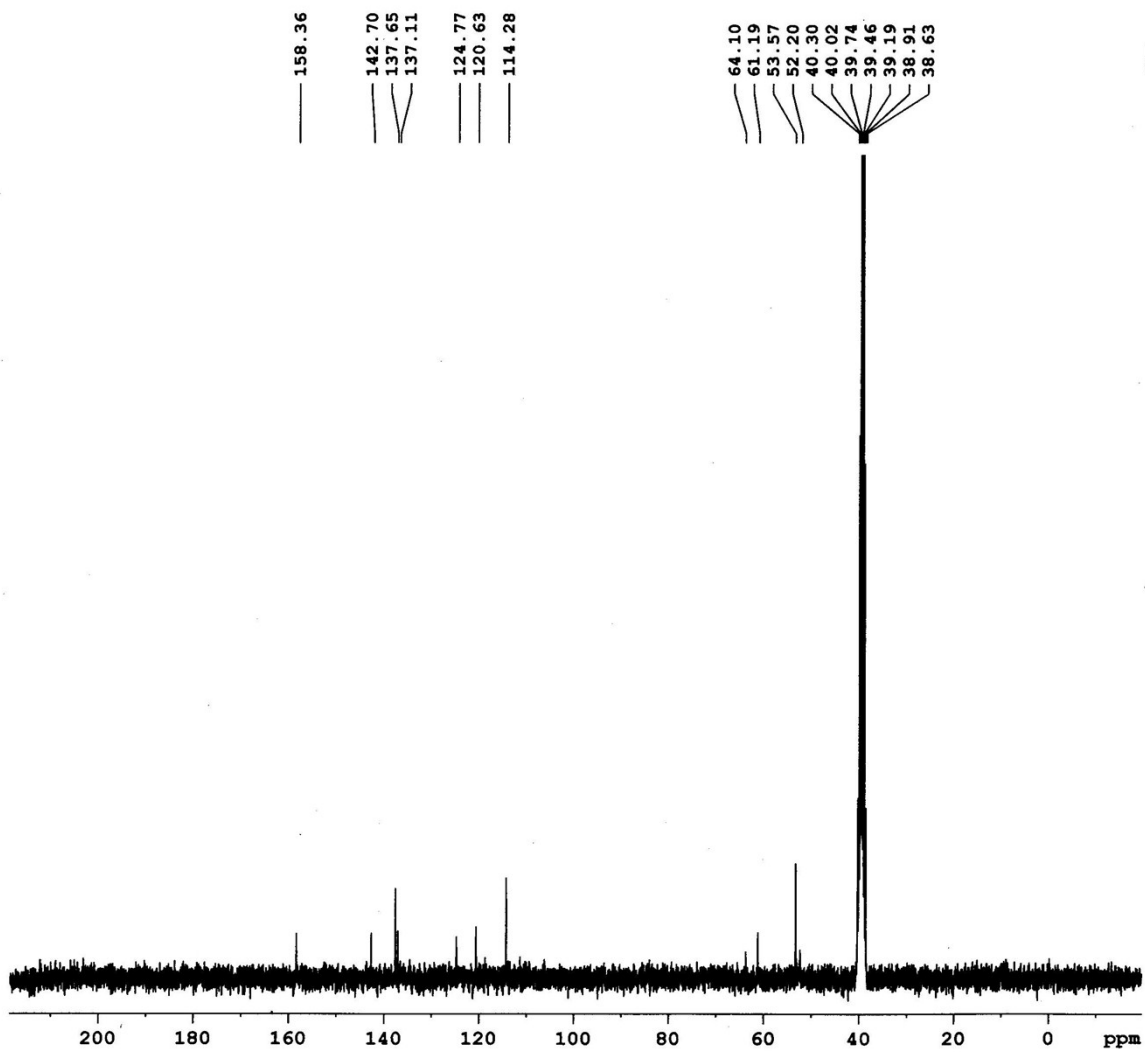

$^{13}\text{C}$  NMR spectrum (75 MHz,  $\text{CDCl}_3$ ) of the first generation chlorodendron 6

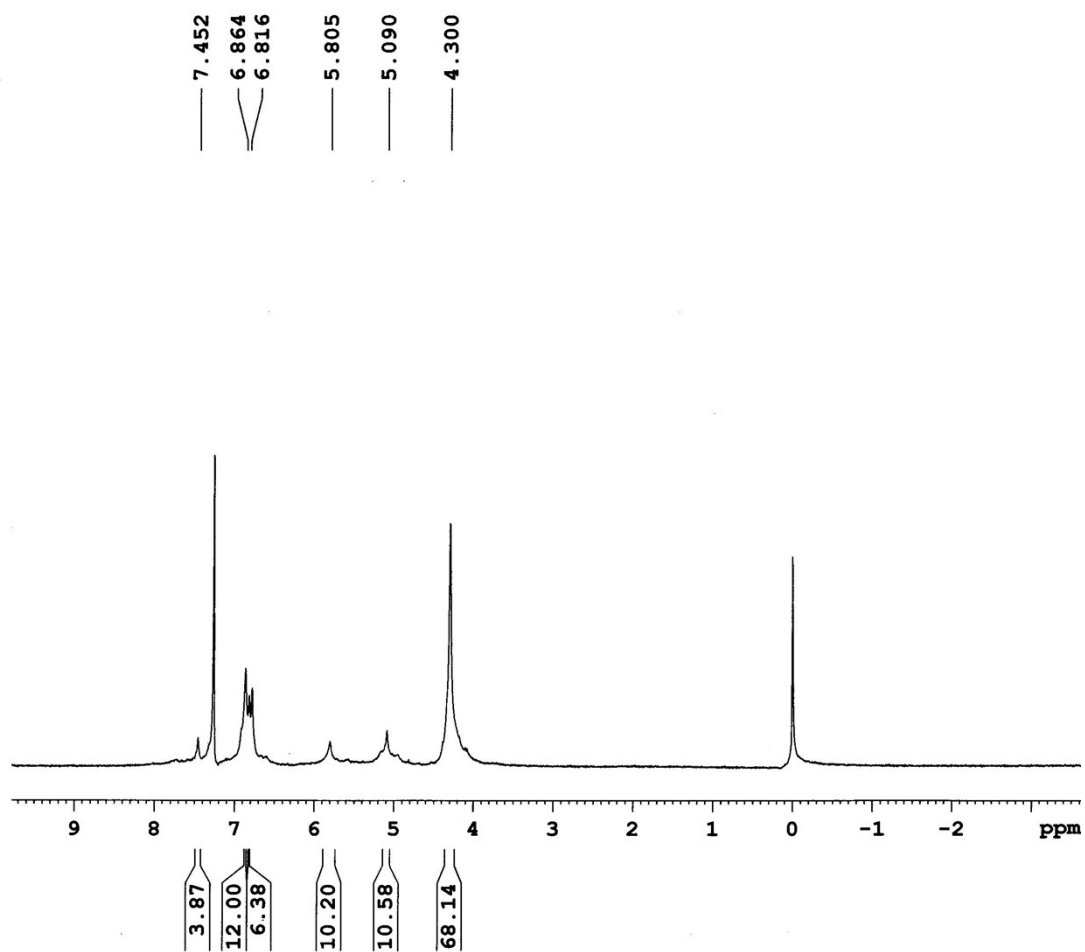

$^1\text{H}$  NMR spectrum (300 MHz,  $\text{CDCl}_3$ ) of the first generation azidodendron 7

UNIV. OF MADRAS

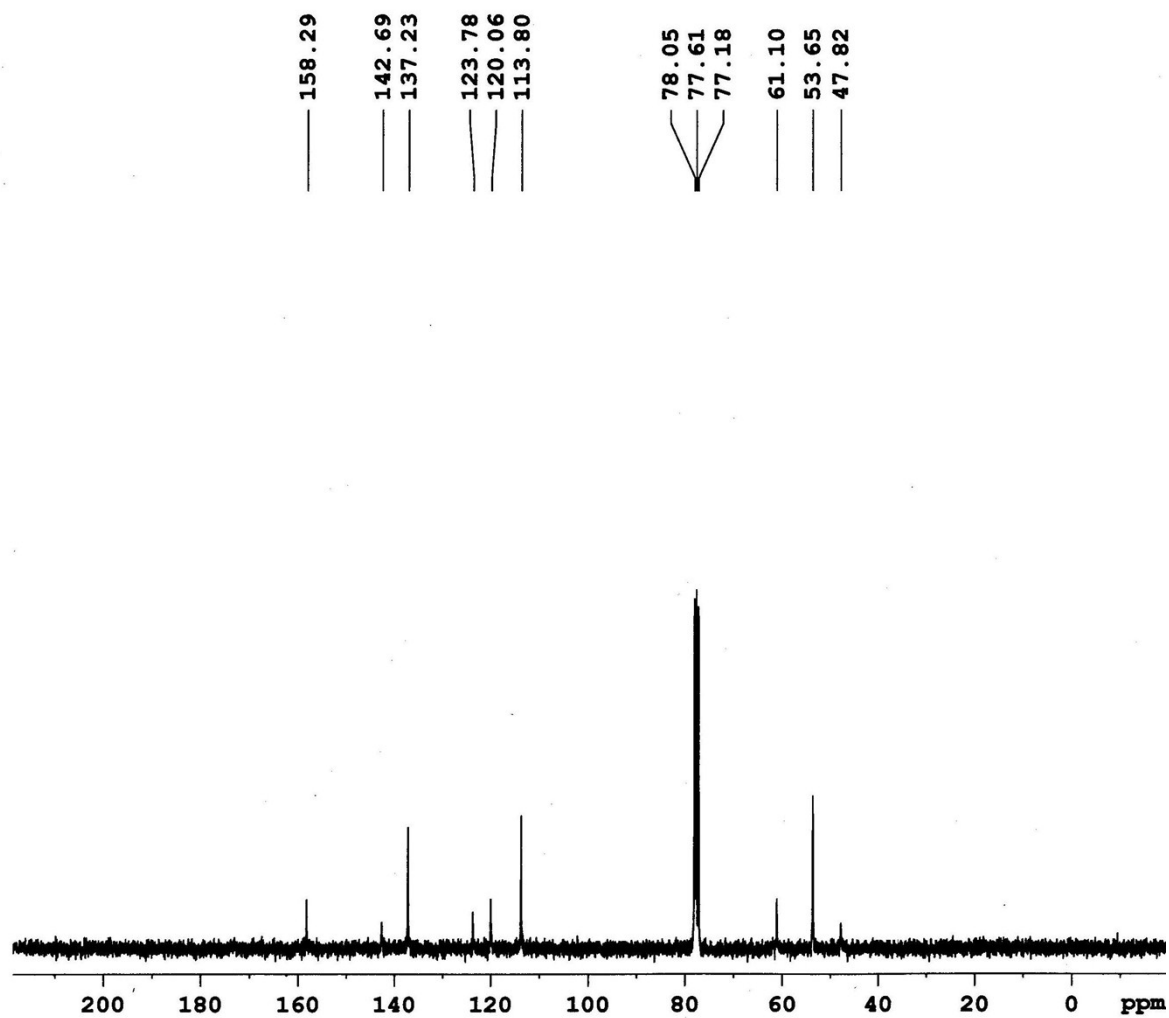

$^{13}\text{C}$  NMR spectrum (75 MHz,  $\text{CDCl}_3$ ) of the first generation azidodendron 7

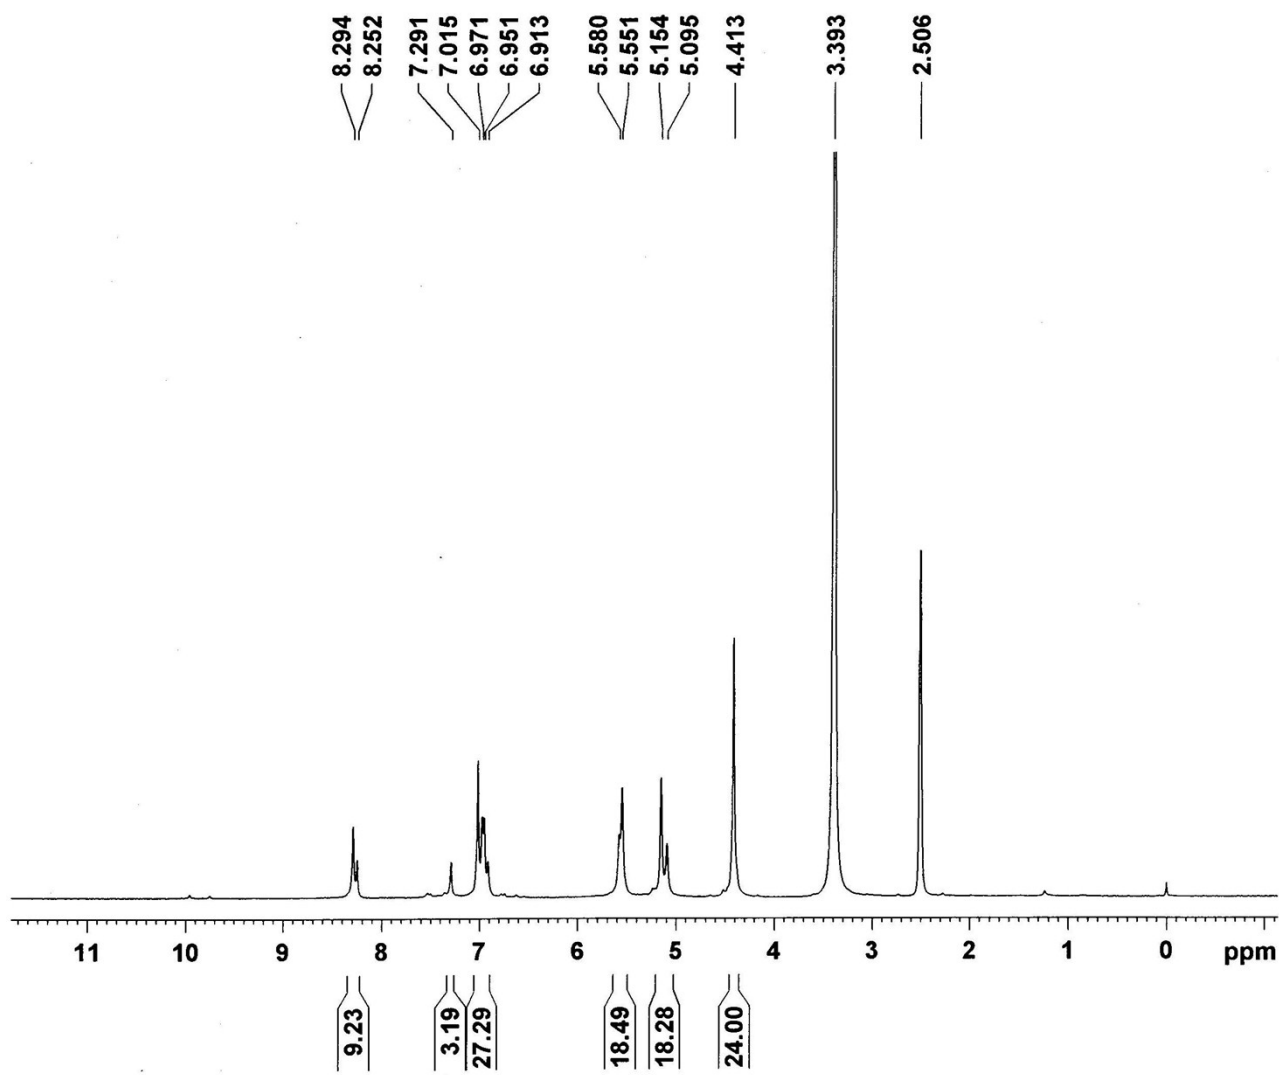

**$^1\text{H}$  NMR spectrum (300 MHz,  $\text{CDCl}_3$ ) of the second generation azidodendron 9**



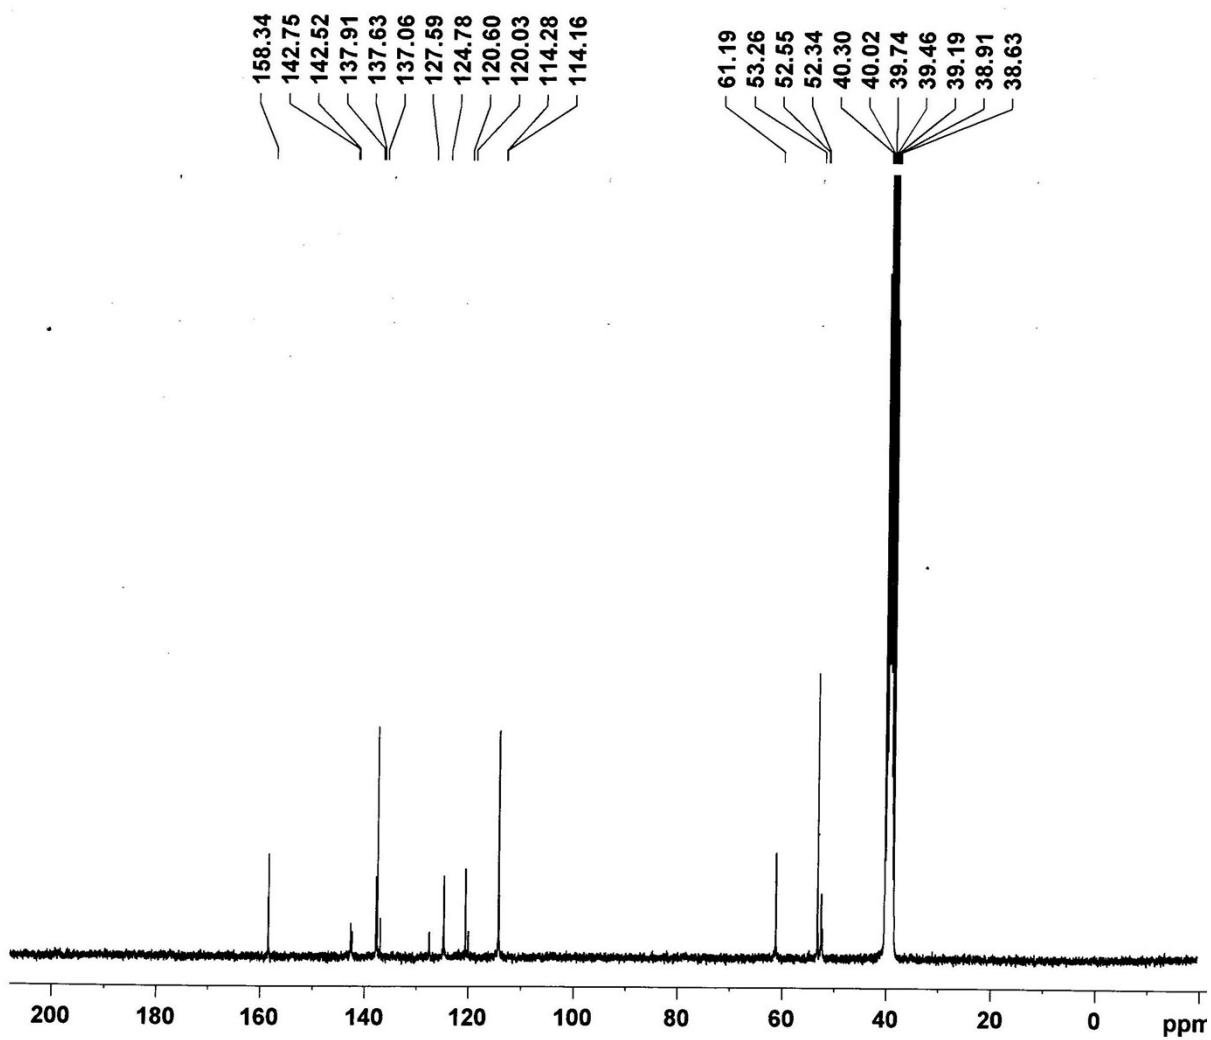

$^{13}\text{C}$  NMR spectrum (75 MHz,  $\text{CDCl}_3$ ) of the second generation azidodendron 9:

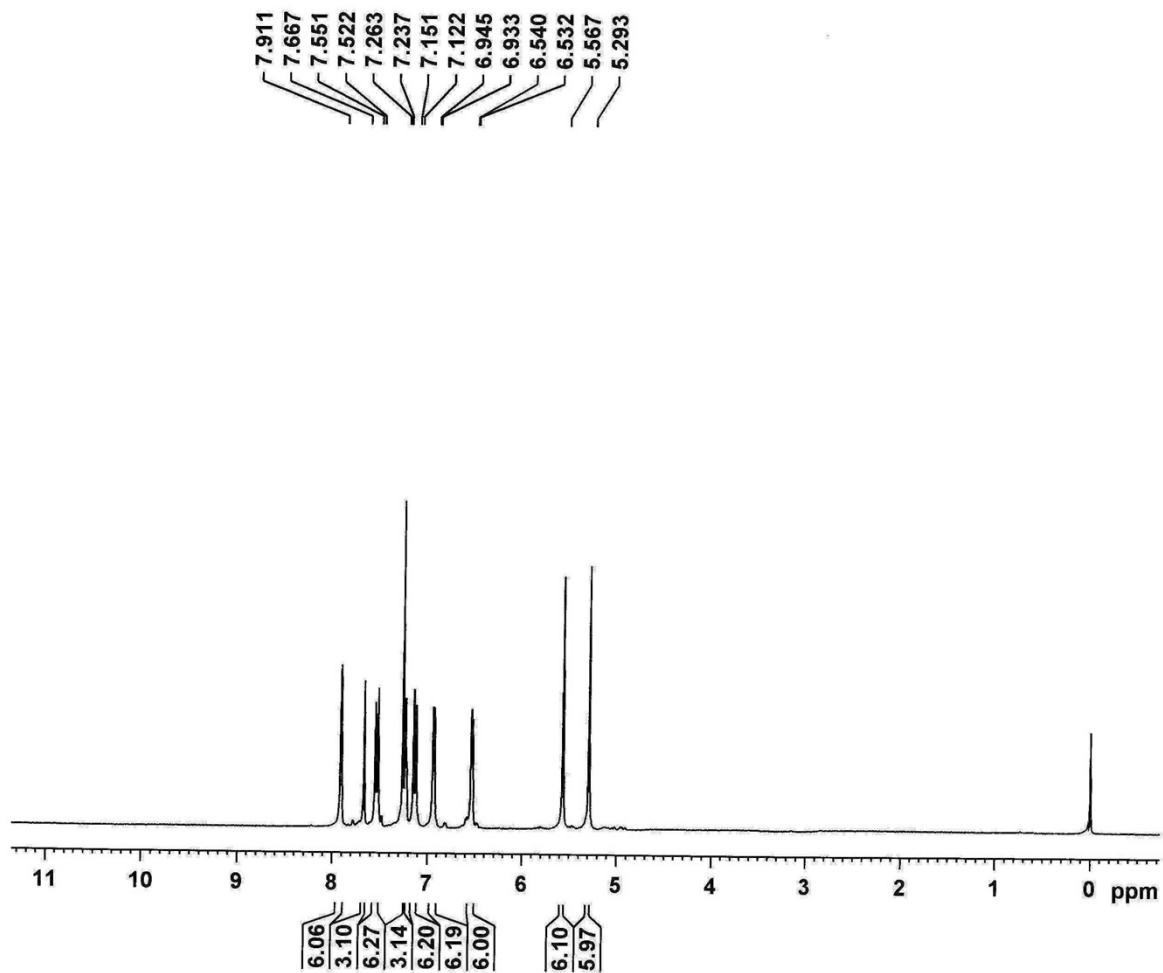

$^1\text{H}$  NMR spectrum (300 MHz,  $\text{CDCl}_3$ ) of the BODIPY dendrimer 1

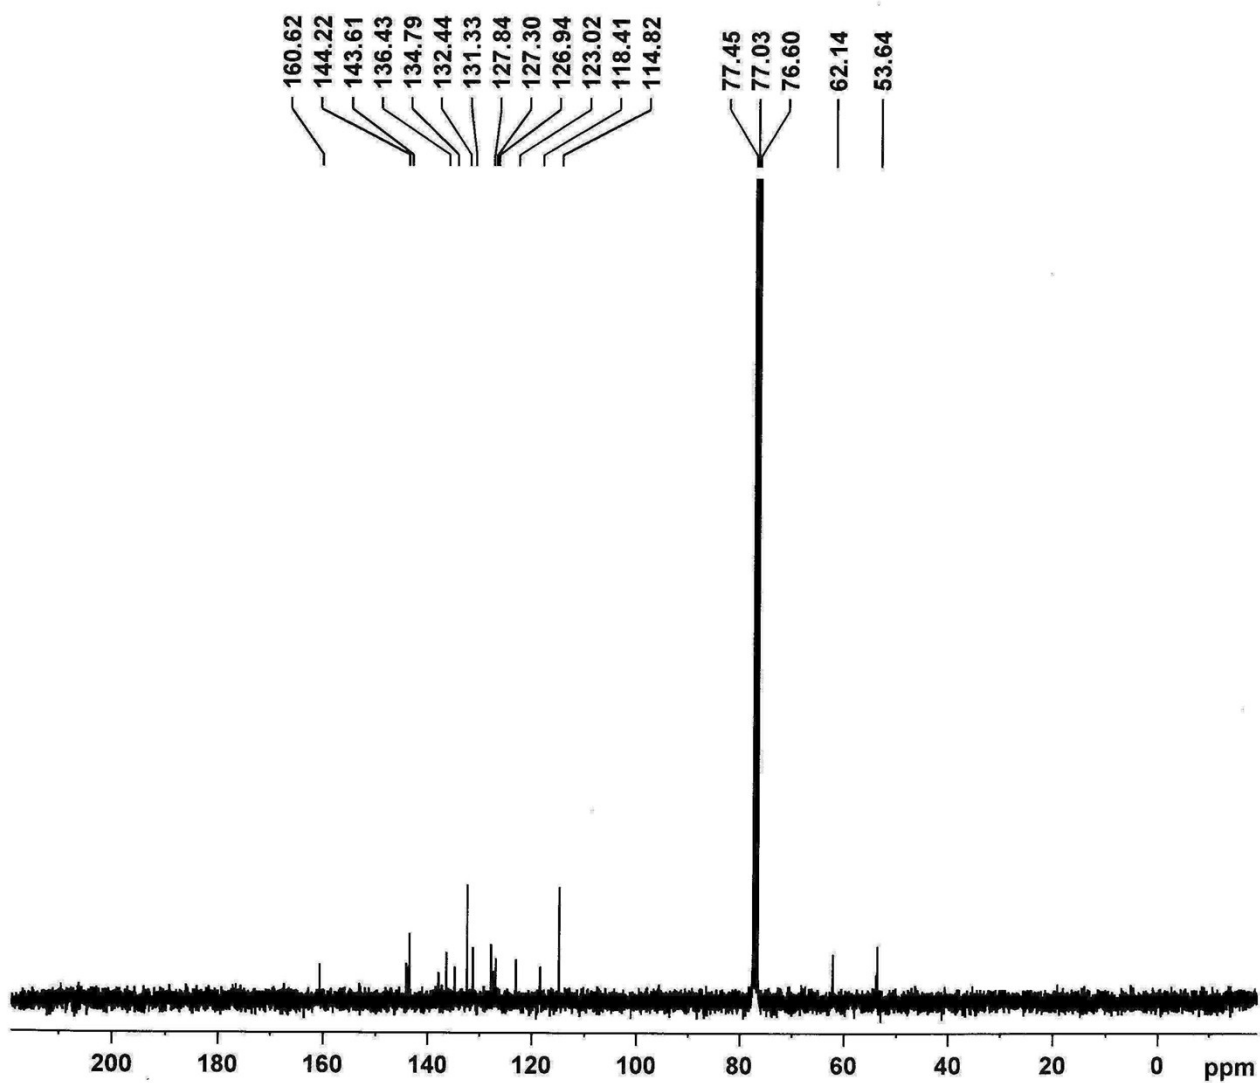

$^{13}\text{C}$  NMR spectrum (75 MHz,  $\text{CDCl}_3$ ) of the BODIPY dendrimer 1

UNIV. OF MADRAS

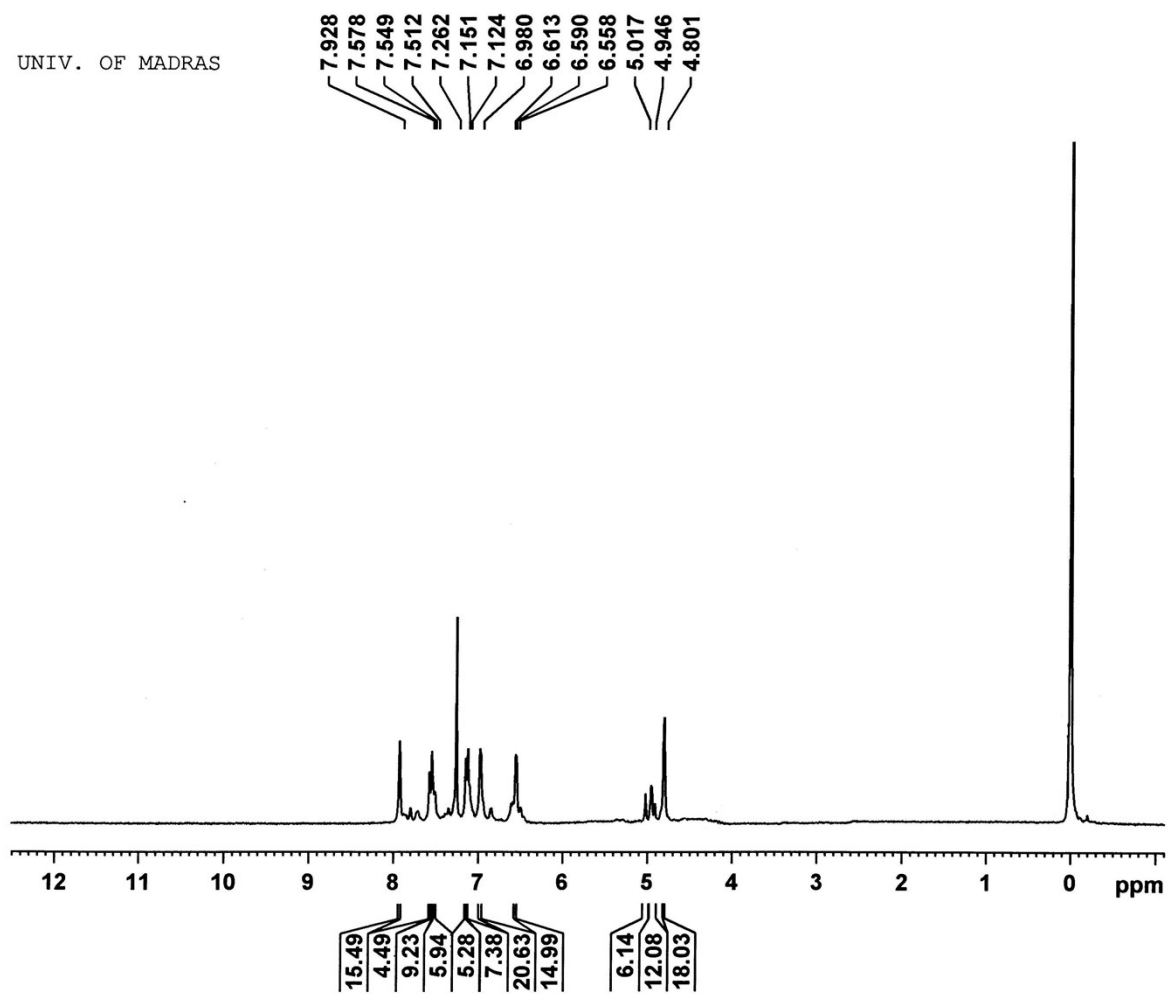

**$^1\text{H}$  NMR spectrum (300 MHz,  $\text{CDCl}_3$ ) of the BODIPY dendrimer 2**

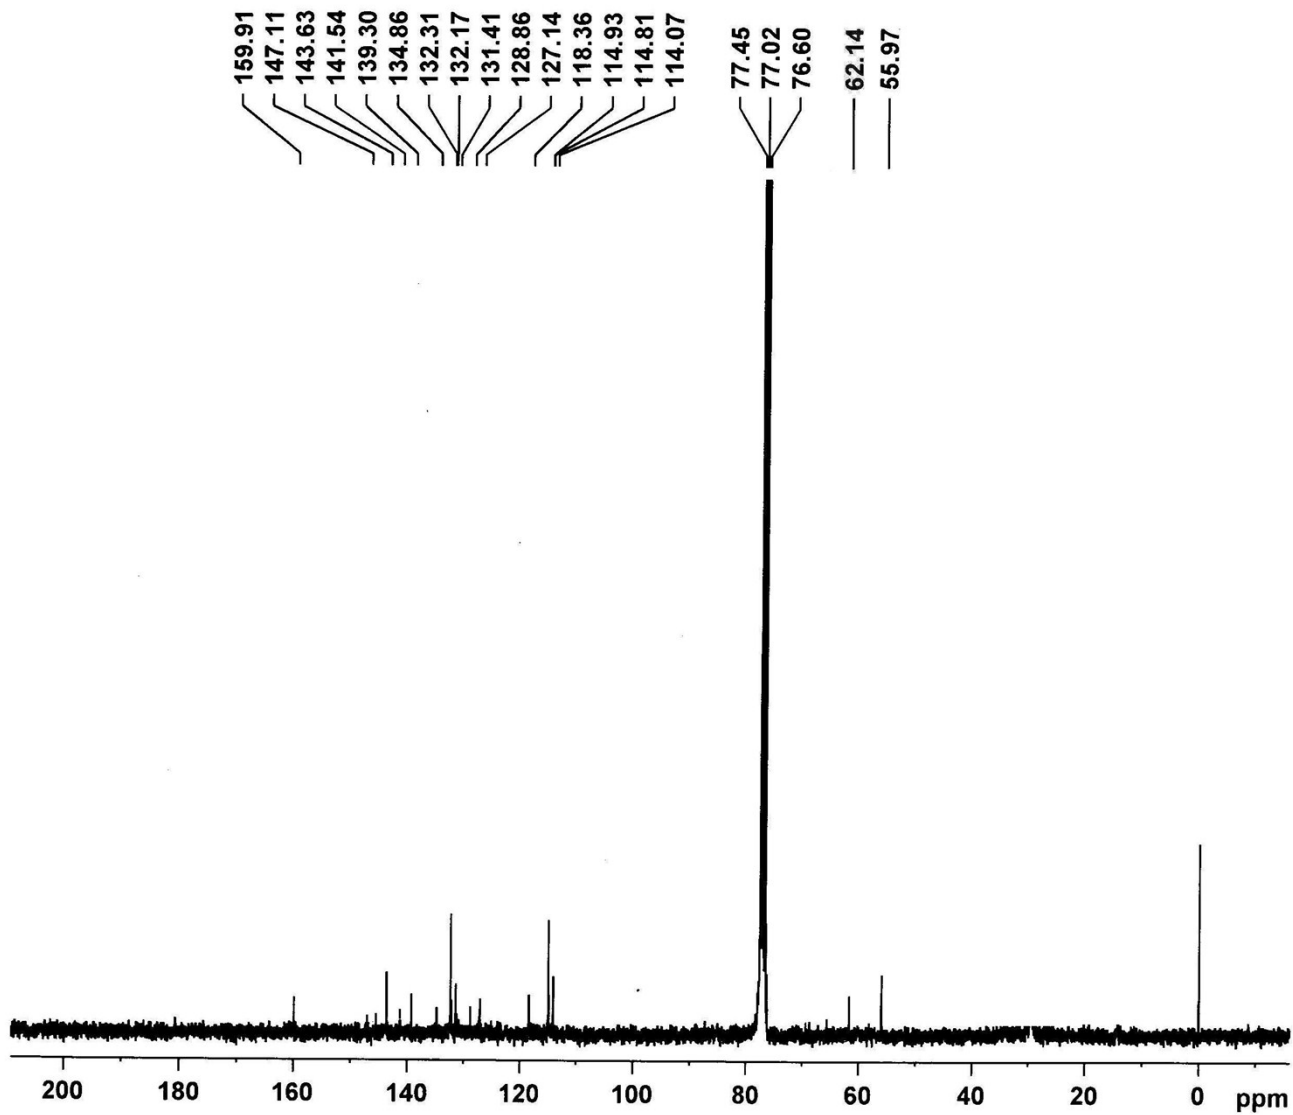

$^{13}\text{C}$  NMR spectrum (75 MHz,  $\text{CDCl}_3$ ) of the BODIPY dendrimer 2

UNIV. OF MADRAS

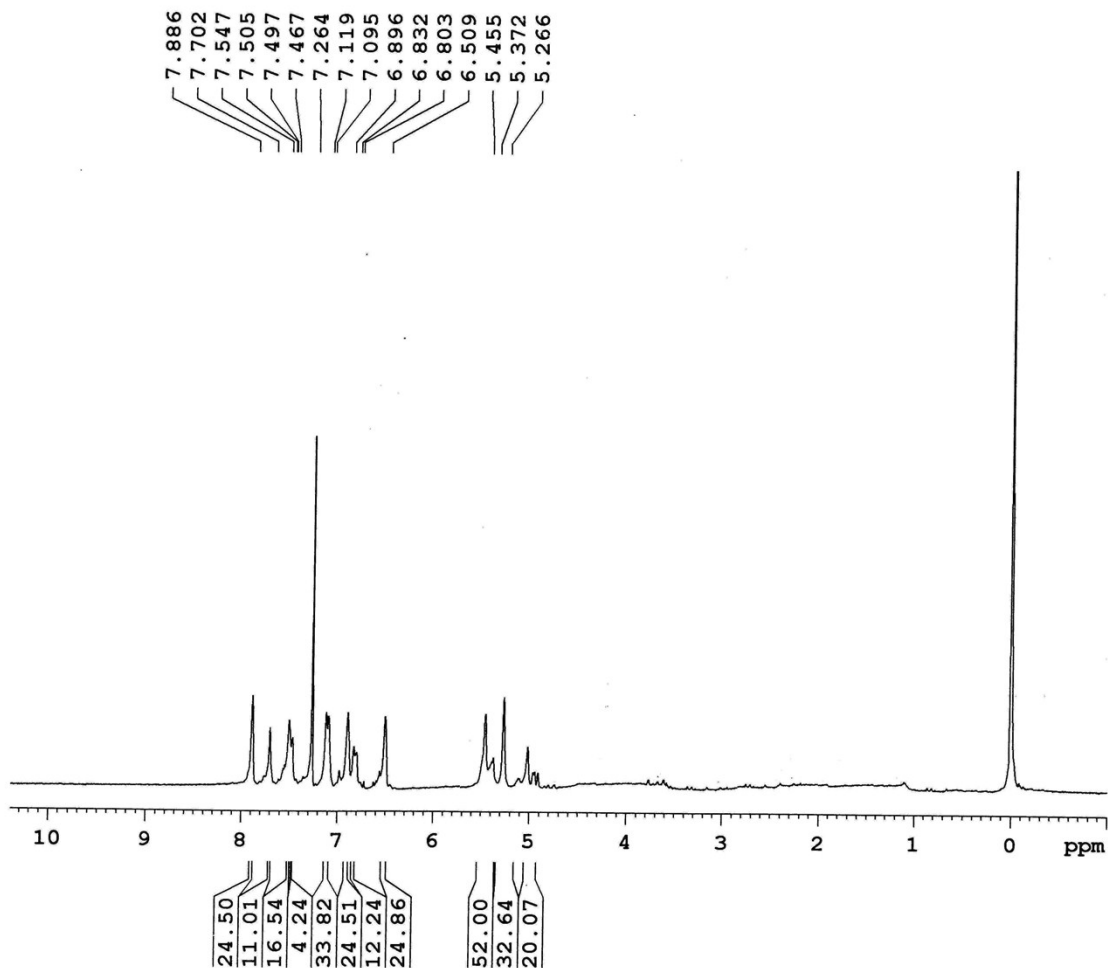

**$^1\text{H}$  NMR spectrum (300 MHz,  $\text{CDCl}_3$ ) of the BODIPY dendrimer 3**

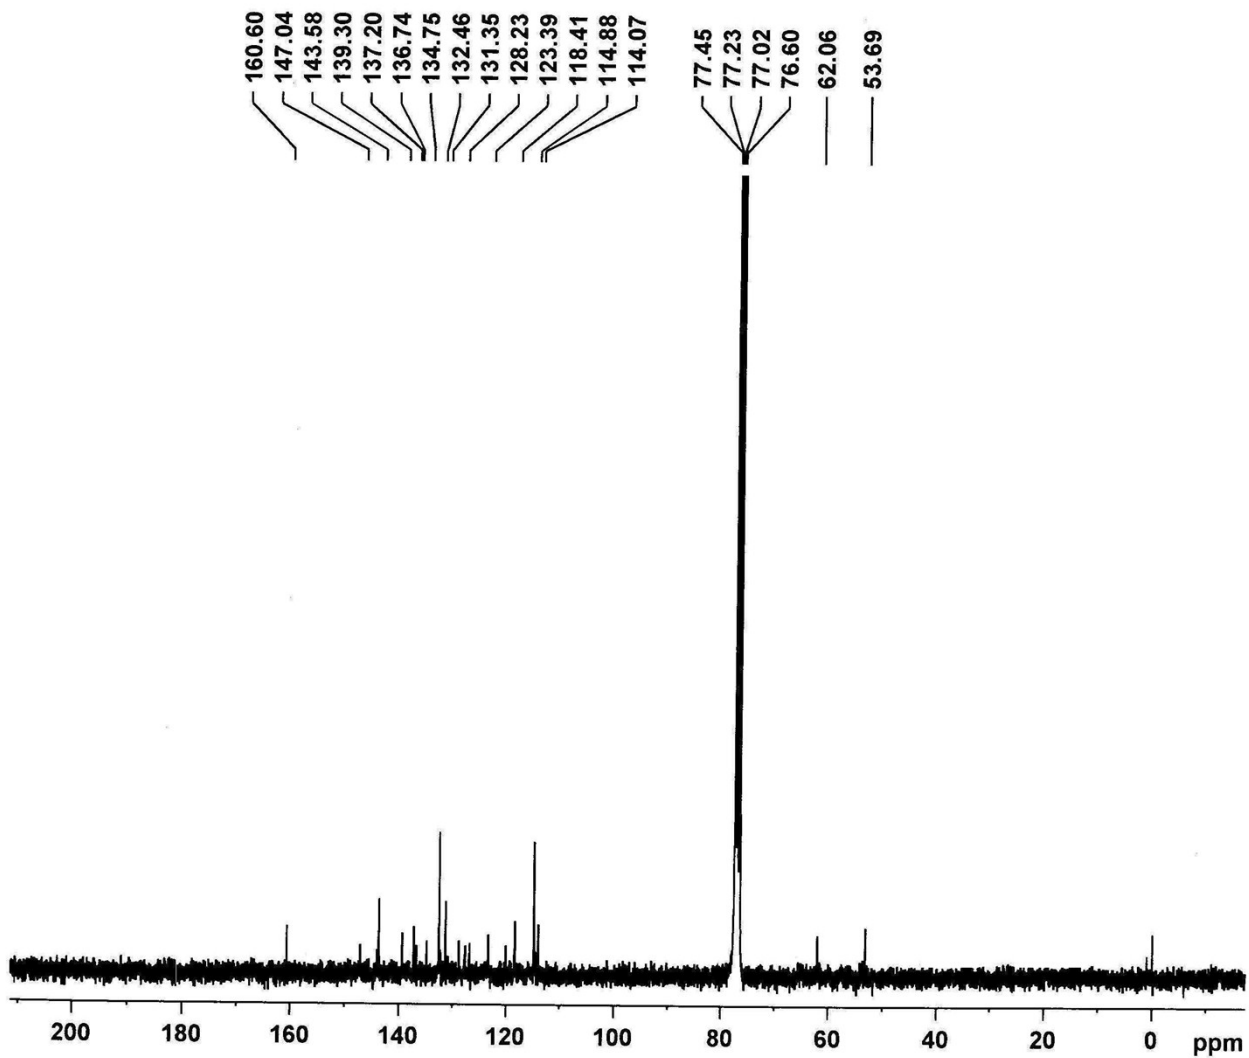

$^{13}\text{C}$  NMR spectrum (75 MHz,  $\text{CDCl}_3$ ) of the BODIPY dendrimer 3

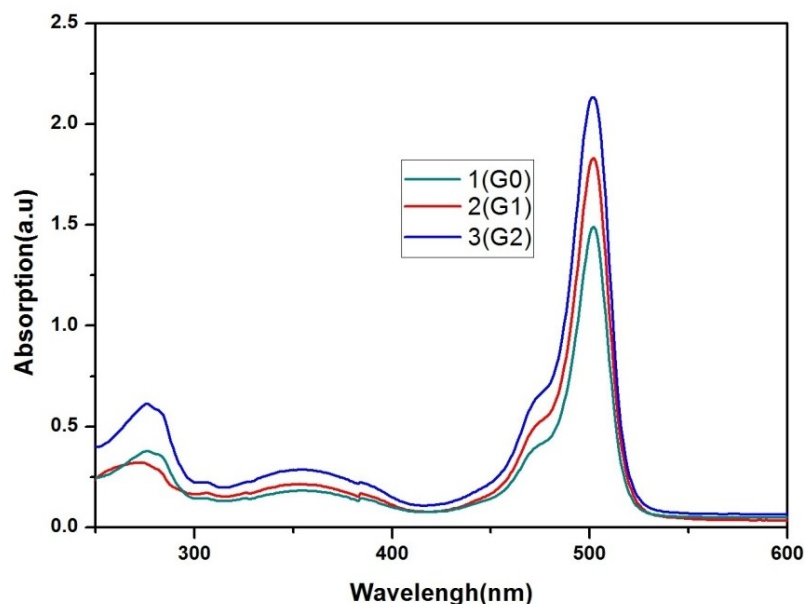

**Figure S1:** BODIPY dendrimers 1, 2 and 3 for UV-Vis absorption spectra of dye-adsorbed TiO<sub>2</sub> electrode

**Table S1:** BODIPY dendrimers 1, 2 and 3 for UV-Vis absorption spectra of dye-adsorbed TiO<sub>2</sub> electrode

| Entry No      | $\lambda_{\text{abs max}}$ (nm)<br>(Figure 2A) |
|---------------|------------------------------------------------|
| <b>1 (Go)</b> | <b>276, 384, 501</b>                           |
| <b>2 (G1)</b> | <b>277, 385, 502</b>                           |
| <b>3 (G2)</b> | <b>278, 386, 503</b>                           |

The SEM analysis of the TiO<sub>2</sub> without BODIPY dye thickness is 914 nm, while the BODIPY coated TiO<sub>2</sub> is 1310 nm and the amount of BODIPY is on TiO<sub>2</sub> is 396 nm

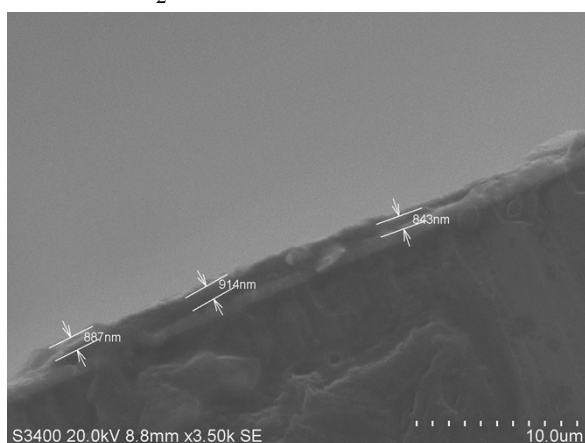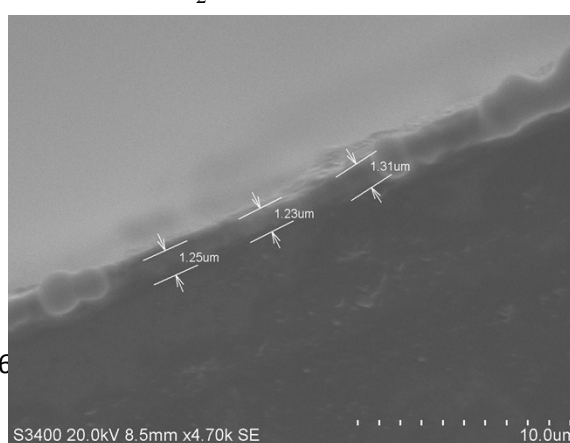



**Figure S2** The SEM analysis of a)TiO<sub>2</sub> coated b) BODIPY with TiO<sub>2</sub>

BODIPY dendrimer **1**, **2**, **3** dye has anchoring group such as triazolyl and BODIPY group as a result the power conversion efficiency was increases from lower to higher generation dendrimer due to the increasing BODIPY group in the

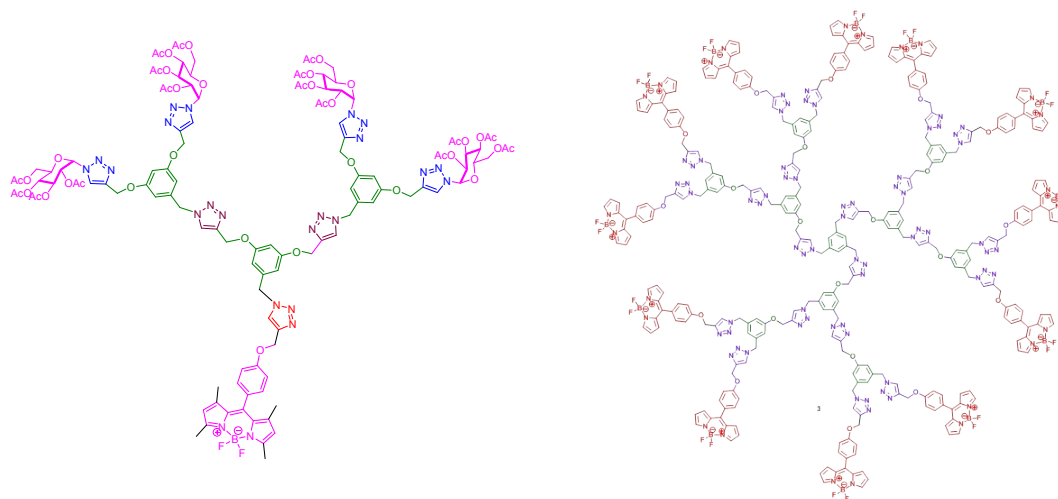

**Figure S3:**The anchoring group in the dendrimer for DSSC studies core and surface;

**Table S2 :**The anchoring group in the dendrimer for DSSC studies core and surface;

| System                                                         | Voltage (mV) | Current (mA) | Fillfactor | Efficiency ( $\eta$ ) % |
|----------------------------------------------------------------|--------------|--------------|------------|-------------------------|
| TiO <sub>2</sub> / BODIPY dye core /KI/I <sub>2</sub> /Pt/1    | 604          | 2.4          | 0.5        | 0.72                    |
| TiO <sub>2</sub> / BODIPY dye core /KI/I <sub>2</sub> /Pt/2    | 620          | 2.6          | 0.51       | 0.82                    |
| TiO <sub>2</sub> / BODIPY dye core /KI/I <sub>2</sub> /Pt/3    | 640          | 2.9          | 0.5        | 0.93                    |
| TiO <sub>2</sub> / BODIPY dye surface /KI/I <sub>2</sub> /Pt/1 | 670          | 3.4          | 0.51       | 1.7                     |
| TiO <sub>2</sub> / BODIPY dye surface/KI/I <sub>2</sub> /Pt/2  | 698          | 4            | 0.52       | 2.1                     |
| TiO <sub>2</sub> / BODIPY dye surface /KI/I <sub>2</sub> /Pt/3 | 725          | 4.7          | 0.52       | 2.5                     |
